# Supplementary material for: Robot-assisted and video-assisted thoracoscopic surgery for thymoma: comparison of the perioperative outcomes using inverse probability of treatment weighting method
Source: PubMed Central journal article supplement — Gland Surg. 2022 Aug;11(8):1287–300. doi: 10.21037/gs-22-333 (PMC9445717; doi:10.21037/gs-22-333), 2022-08
Supplement: gs-11-08-1287-dss.pdf [file gs-11-08-1287-dss.pdf]

## Data Sharing Statement

|                     |                                                                                                                                                    |                                                                                                                  |
|---------------------|----------------------------------------------------------------------------------------------------------------------------------------------------|------------------------------------------------------------------------------------------------------------------|
| <b>Article Info</b> | https://dx.doi.org/10.21037/gs-22-333                                                                                                              |                                                                                                                  |
| <b>Item</b>         | <b>Question</b>                                                                                                                                    | <b>Authors' Response</b><br>(place "-" if not applicable)                                                        |
| 1                   | Would you like to share data collected for your study to others?                                                                                   | Yes.                                                                                                             |
| 2                   | If not, would you like to share the reason for your decision?                                                                                      | -                                                                                                                |
| 3                   | What data in particular will be shared?                                                                                                            | The data of postoperative quality of life, pain grade, and surgical outcome data will be shared.                 |
| 4                   | Any other documents will be share? Such as study protocol, statistical analysis plan, informed consent form, clinical study report, analytic code. | Statistical analysis plan will be shared.                                                                        |
| 5                   | When will data availability begin?                                                                                                                 | From the publication date.                                                                                       |
| 6                   | When will data availability end?                                                                                                                   | Two years within the publication date, since the technique or surgical outcome data may be updated over time.    |
| 7                   | To whom will you share the data?                                                                                                                   | Medical oncologists and thoracic surgeons.                                                                       |
| 8                   | For what type of analysis or purpose?                                                                                                              | For analysis to evaluate the safety and the improvement in postoperative quality of life of robot for thymoma.   |
| 9                   | How or where can the data/documents be obtained?                                                                                                   | Emails could be sent to the address below to obtain the shared data:<br><br>yc.kame1992@gmail.com                |
| 10                  | Any other restrictions?                                                                                                                            | We may balance the potential benefits and risks for each request and then provide the data that could be shared. |
